# Supplementary material
Source: Springer Nature journal article supplement (https://www.springermedizin.de/resource/supplementary/12935_2012_407_MOESM4_ESM.pdf/9540548)

A

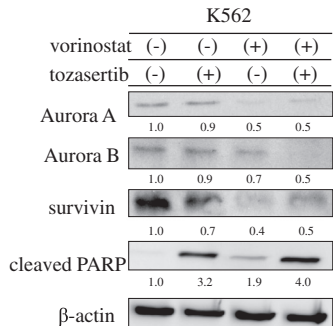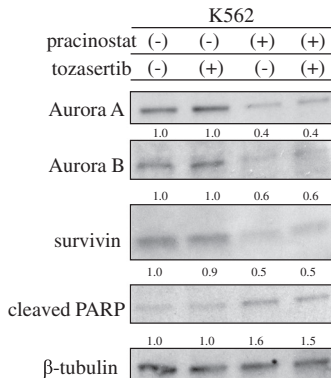

B

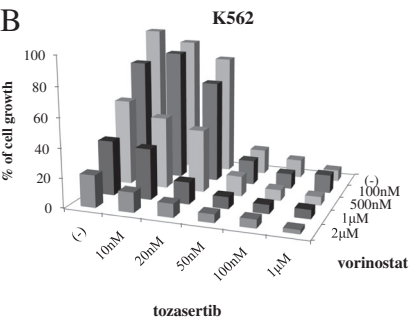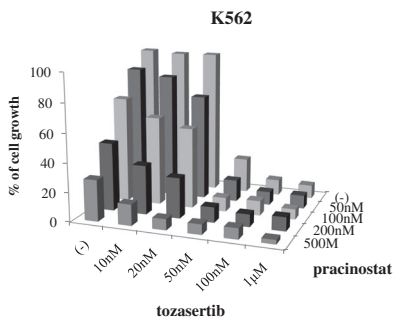

C

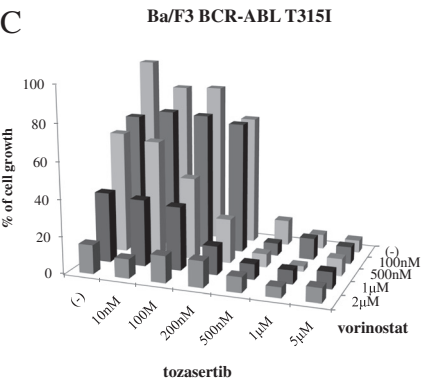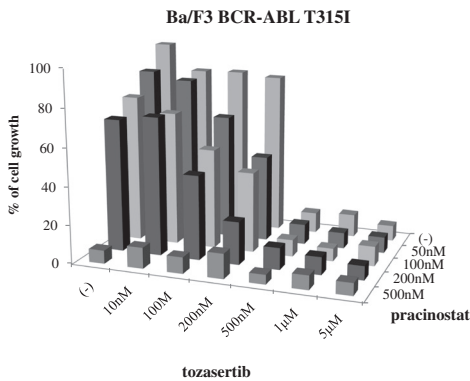

Supplement: MOESM4 [file 9540548]
